1 **Rewinding the molecular clock in the genus *Carabus* (Coleoptera: Carabidae): Revisiting**  
2 **Andujar et al. in light of new fossil evidence and the Gondwana split**

3 Lars Opgenoorth\*, Philipps-University Marburg, Fachbereich Biologie, Allgemeine Ökologie und  
4 Tierökologie, Karl-von-Frisch Str. 8, D-35043 Marburg, Germany, [opgenoorth@uni-marburg.de](mailto:opgenoorth@uni-marburg.de) WSL  
5 Swiss Federal Research Institute, Zuercherstrasse 111, 8903 Birmensdorf, Switzerland

6 Sylvia Hofmann, Helmholtz Centre for Environmental Research – UFZ, Department of Conservation  
7 Biology, Permoserstr. 15, 04318 Leipzig, [sylvia.hofmann@ufz.de](mailto:sylvia.hofmann@ufz.de)

8 Joachim Schmidt\*, Universität Rostock, Institut für Biowissenschaften, Allgemeine und Spezielle  
9 Zoologie, Universitätsplatz 2, 18055 Rostock, [schmidt@agonum.de](mailto:schmidt@agonum.de)

10 \*corresponding authors

11 **1 Abstract**

12 **Background** Molecular clocks have become powerful tools given increasing sequencing and  
13 fossil resources. However, outcome of calibration analyses depend on choosing priors. Here we  
14 revisit a seminal dating study of the genus *Carabus* by Andujar et al. proposing that their prior  
15 choices need re-evaluation with the hypothesis that reflecting fossil evidence and the  
16 Gondwanan split properly rewinds the molecular clock significantly. We used the similar dataset  
17 including five mitochondrial and four nuclear DNA fragments with 7888 nt total length. We set  
18 the root age based on the fossil evidence of Harpalinae ground beetles in the Upper Cretaceous  
19 and introduce the Paleogene divergence of the outgroup taxa *Ceroglossus* (endemic to South-  
20 America) and *Pamborus* + *Maoripamborus* (Australia, New Zealand) as a new prior based on  
21 current paleontological and geological literature.

22 **Results** The ultrametric time-calibrated tree of the extended nd5 dataset resulted in a median  
23 TMRCA *Carabus* age of 59.72 Ma (HPD95% 49.92-70.38), roughly 35 Ma older than in the  
24 Andujar study. The splits between *C. rugosus* and *C. morbillosus* (A), between *C. riffensis* from  
25 the European *Mesocarabus* (B), and between *Eurycarabus* and *Nesaeocarabus* (C) were dated  
26 to 19.19 (13.16-25.64), 25.95 (18.68-33.97), and 23.99 (17.75-31.67) Ma and were thus  
27 decidedly older than previously reported (7.48, 10.93, and 9.51 Ma). Constraining the Carabidae  
28 time tree root with the Burmese Oodini amber fossil at ~99 Ma resulted in the largest increase,  
29 while including the Canary Hotspot and Gondwana split calibrations stabilized the overall dating,  
30 mediating between the root and remaining calibration points. Utilizing our clades A-C results,  
31 TMRCA of *Carabus* was dated to 53.56 (41.25-67.05) Ma in the complete MIT-NUC data set  
32 compared to 25.16 (18.41-33.04).

33 **Conclusion** Taking into account the Gondwanan split as a new prior, together with the fossil  
34 evidence of the outgroup taxon Harpalini in the Late Cretaceous, our new approach supports an  
35 origin of the genus *Carabus* in the Paleocene-Early Eocene. Our results are preliminary due to  
36 the heavy reliance on the nd5 gene and thus will have to be tested with sufficient set of nuclear  
37 markers. Such subsequent analyses will likely extend the dating even further back in time.

38 **Keywords** *Carabus*, calibration, time-tree, fossil record

39

## 40 2 Background

41 The molecular clock has become an increasingly powerful tool in biogeography and  
42 phylogenetics due to the ever increasing genomic and fossil calibration data [1]. However,  
43 phylogenetic dating is largely performed in Bayesian frameworks where the choice and number  
44 of calibration priors has a deciding impact on dating results [1, 2]. Consequently, there is often  
45 still huge dating variance among studies even dealing with identical taxa and employing identical  
46 calibration points. Important factors for the disagreement are the placement of fossils in a given  
47 phylogeny and the handling of geological priors. The first is a matter of taxonomic discussion  
48 among species group specialists. Recent methodological improvements for better analyses of  
49 hidden characters in fossils like the usage of X-ray micro-computed tomography of amber  
50 inclusions to determine internal genital characteristics of tiny beetles [3, 4] may help to resolve  
51 ambiguities in the long term. The handling of geological priors on the other hand is a broader  
52 discussion where the improvement could and should be somewhat more predictable and  
53 transparent across taxonomic groups. However, exactly in this part of the equation one can  
54 observe an almost arbitrary choice of geological sources and thus setting of respective molecular  
55 clocks [5]. One classical geological event that has broadly left its imprint on biogeographic  
56 patterns is the split up and fragmentation of the Gondwanan land masses [6]. Studying the widely  
57 reviewed biogeographical literature dealing with the Gondwanan split it becomes evident that  
58 two general patterns emerge. Taxa that are good dispersers and occur on a broad range of  
59 terrestrial habitats have very diverse phylogeographic histories, often independent of the timing  
60 of the Gondwanan fragmentation. On the other hand are taxa with poor dispersal capabilities  
61 and often very specific habitat preferences. Their evolutionary histories reflect the trademark  
62 vicariance pattern [6]. Examples range from chironomid midges [7], stoneflies [8], scorpions [9],  
63 anurans [10] to plants such as *Nothofagus* [11], but see [12]. Only for this second category (poor  
64 dispersers), the geological record is a means to calibrate the molecular clock.

65 Here, we want to revisit a seminal study for the calibration of the phylogeny of *Carabus* ground  
66 beetles [13] reflecting both, fossil evidence for the outgroup and recent geological as well as  
67 biogeographical consensus on the fragmentation of the Gondwanan land masses. *Carabus*  
68 generally is described as a Holarctic genus that currently counts about 940 described species  
69 classified into 91 subgenera [14]. Its diversification is largely bound to the Palaearctic with a  
70 distribution throughout Eurasia, Japan, Iceland, the Canary Islands, North Africa and North  
71 America [14–18]. *Carabus* represents the most species diverse terminal clade of the “supertribe  
72 Carabitae” which also includes the Holarctic Cychrini, the Andean Ceroglossini (= *Ceroglossus*),  
73 the Australasian Pamborini (= *Pamborus* + *Maoripamborus*), and the cosmopolitan Calosomina  
74 (= *Calosoma sensu lato*). The latter was identified as a sister group of *Carabus* based on  
75 molecular data [13, 19] which is in agreement with the morphological data [15].

76 Based on an evolutionary model proposed by Terry L. Erwin in 1979 [20] the Carabitae  
77 represents a very old lineage of Geadephaga with its primary diversification reflecting continental  
78 drift events during the late Early Cretaceous. Penev et al. [15] propose that species belonging to  
79 the recent genera *Calosoma* and *Carabus* were present at least in the early Cenozoic time.  
80 These hypotheses are in contrast to the evolutionary models proposed by Andujar et al. [13] and  
81 Deuve et al. [14] based on molecular data. The latter authors propose a first diversification of  
82 Carabitae in the Paleocene-Eocene with a split of *Calosoma* and *Carabus* not until before the  
83 Oligocene. Such an Oligocene emergence of the megadiverse genus *Carabus* is surprising with  
84 respect to the fossil evidence in the Carabidae family. Recent studies of Baltic amber inclusions  
85 make clear that representatives of modern ground beetle genera already existed during the  
86 Eocene, even those from the “modern Carabidae” (subfamily Harpalinae), with certain fossil  
87 species of the extant genera *Calathus* of the tribe Sphodrini [21], *Coptodera* of Lebiini [22], and  
88 *Limodromus* of Platynini [23]. In addition, the presence of Harpalinae is evident in the fossil  
89 record since the early Late Cretaceous [24, 25]. Finally, there is certain evidence from molecular  
90 genetic studies that Carabitae are phylogenetically older than Harpalinae [26–28], and that  
91 Harpalinae underwent a rapid speciation in the Late Cretaceous and Early Cenozoic [29, 30]. In

92 this regard, the question arises why the Carabidae would have undergone this markedly long  
93 phylogenetic standstill, which lasted a period of not less than 50–60 Ma.

94 This obvious dilemma leads us to revisit the dating background of the molecular study of the  
95 genus *Carabus* by Andujar et al. [13], not least because the evolutionary scenario proposed for  
96 this group was subsequently used by other researchers for dating approaches of their  
97 phylogenies of non-Carabidae taxa (e.g., [31–34]). As we will show in the Material & Methods  
98 section in detail, Andujar et al. [13] did include a number of classical geological calibration events,  
99 namely the emergence of the Canary Islands, the Messinian salinity crisis i.e. opening of the  
100 strait of Gibraltar, and the disconnection of Japan from the mainland. In all three cases we argue,  
101 that the approach chosen by them is not plausible from paleogeographical and paleoecological  
102 standpoints, respectively, but reflects a very common oversimplification of historical dispersal  
103 mechanisms. In addition, we like to focus on another important issue of the Carabidae evolution:  
104 From a biogeographical point of view, particularly remarkable are the South American genus  
105 *Ceroglossus* and the Australasian genera *Pamborus* and *Maoripamborus*, which together form  
106 the sister clade to *Carabus* and Calosomina based on molecular data [19]. A previous  
107 morphological based hypothesis of close relationship of *Pamborus* and *Maoripamborus* with the  
108 Cychrini tribe was identified to be a result of convergence [35]. This view is also confirmed by  
109 the molecular data since Cychrini take the basal position within the “supertribe Carabidae” in  
110 previous studies [13, 26]. The split of the South American and Australasian taxa offers an  
111 important additional possibility to calibrate the *Carabus* phylogeny. Since Andujar et al. [13]  
112 neglected this calibration point, we propose that their time tree massively underestimates the  
113 true age of the genus *Carabus*.

114 In the light of these considerations, we hypothesize that i) adding a root age based on fossil  
115 evidence for Harpalinae and the inclusion of the Gondwanan split will push the dating of the  
116 crown age of *Carabus* to at least the Eocene and ii) a proper adjustment of the geological  
117 calibration points used by Andujar et al. [13] will resolve putative contradictions between those  
118 and the fossil data as well as the Gondwanan split. To test these hypotheses we here reanalysed  
119 the datasets of Andujar et al. [13]. Specifically, our new calibration strategy was based on a  
120 review of recent geological and biogeographical literature dealing with i) taxa that have a  
121 Gondwanan distribution, extracting minimum and maximum calibration ages; ii) the onset of the  
122 Canary hotspot, and iii) the uplift of the Atlas mountains. Finally, we will use our findings of the  
123 *Carabus* time tree to discuss the general need of a more differentiated and transparent usage of  
124 geological calibration points depending on life history traits and habitat requirements of the taxa  
125 under study.

## 126 **3 Results**

### 127 **3.1 Calibration analyses with the extended *nd5* data set**

128 In our calibration analyses we used the expanded *nd5* gene dataset of Andujar et al. [13] and as  
129 therein implemented a strict clock and 2P codon partitioning. The ultrametric time-calibrated  
130 phylogenetic tree is shown in Figure 1 with a median TMRCA *Carabus* age of 59.72 Ma (HPD  
131 95% 49.92–70.38 Ma) which is markedly older than the age obtained in the Andujar study. The  
132 resulting mean molecular evolution rate was 0.0073 (95% HPD 0.0056–0.0091) substitutions  
133 per site per million years per lineage (subs/s/Ma/l) compared to 0.0154 (95% HPD 0.0112–  
134 0.0198) in [13]. Nodes A, B and C (Figure 1) had median ages of 19.19 Ma (A), 25.95 Ma (B),  
135 and 24.38 Ma (C) and were thus also decidedly older than in [13] (7.48 Ma, 10.93 Ma, and 9.51  
136 Ma). As expected, the recovery of nodes generally had similar posterior probabilities (PP) as in  
137 the study of Andujar and coworkers thus, nodes A, B, C had PPs of 1.0 in all instances.

138

139

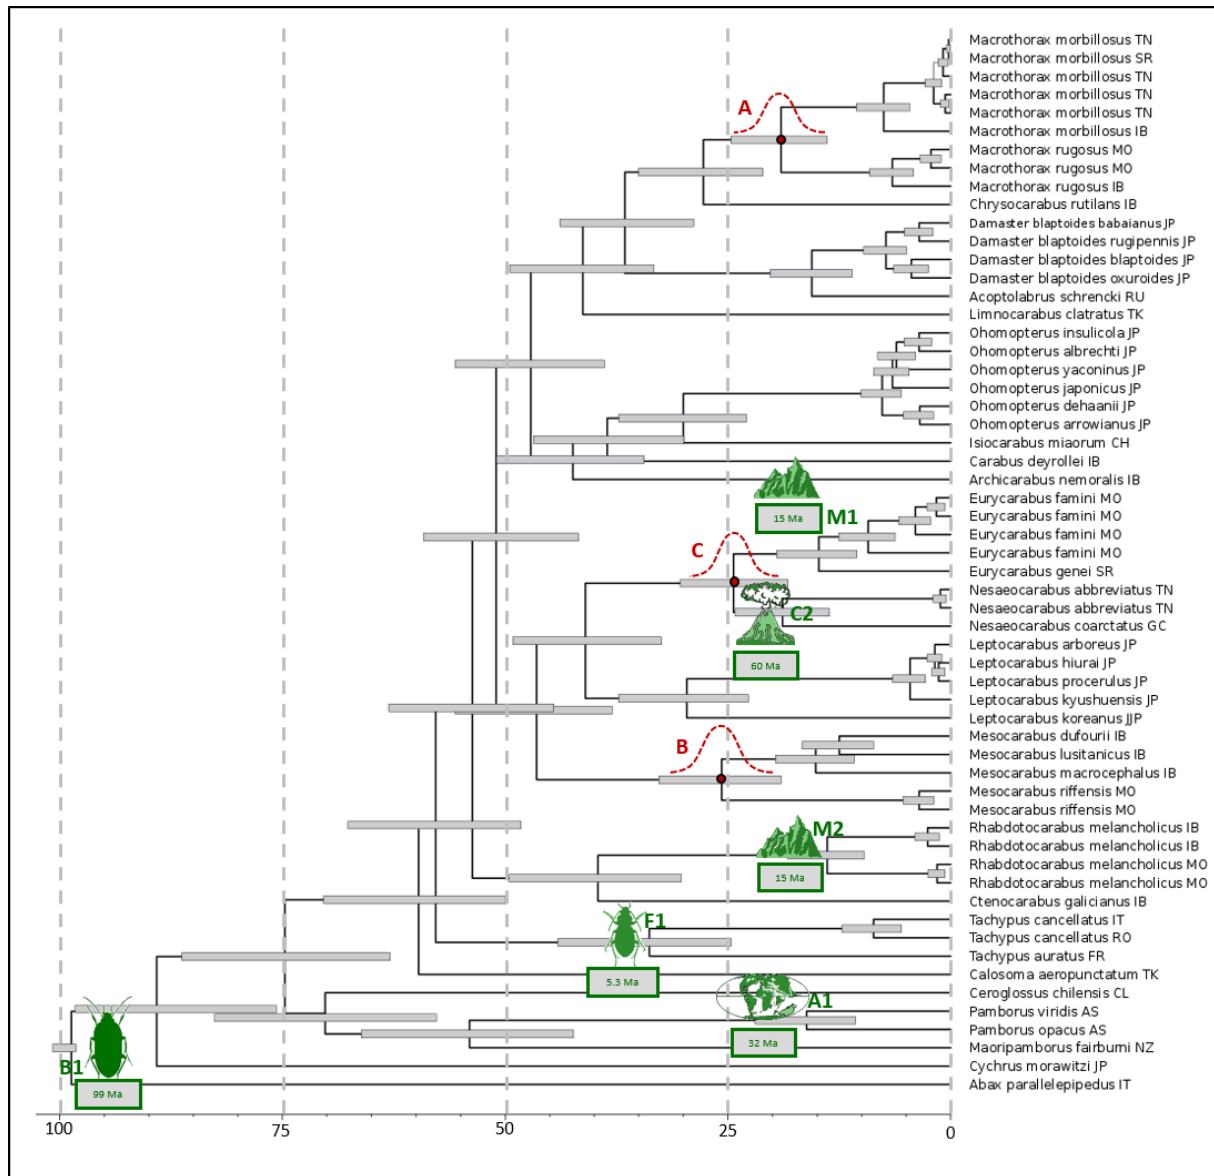

140

141 **Figure 1** Ultrametric time-calibrated phylogenetic tree obtained with BEAST2 for *nd5* data in *Carabus*. Green  
142 symbols depict calibration points employed – see **Table 3** for details. Red symbols depict cladogenetic events whose  
143 age distributions (see **Table 4**) have been utilized in subsequent analyses.

144 The violin plots in Figure 2 illustrate the impact of each calibration point on the timing of important  
145 phylogenetic lineages by depicting the age distribution when all points are used (all) and when  
146 each respective calibration point is left out of the calculation (-m2 through -root). As expected,  
147 constraining the root has the most pronounced impact on the dating overall, decreasing the age  
148 for all clades when left out. The inclusion of the the Canary Hotspot (c) as well as the Gondwana  
149 split calibration (go) in turn expectedly stabilized the overall dating, mediating between the root  
150 and the remaining calibration points.

151

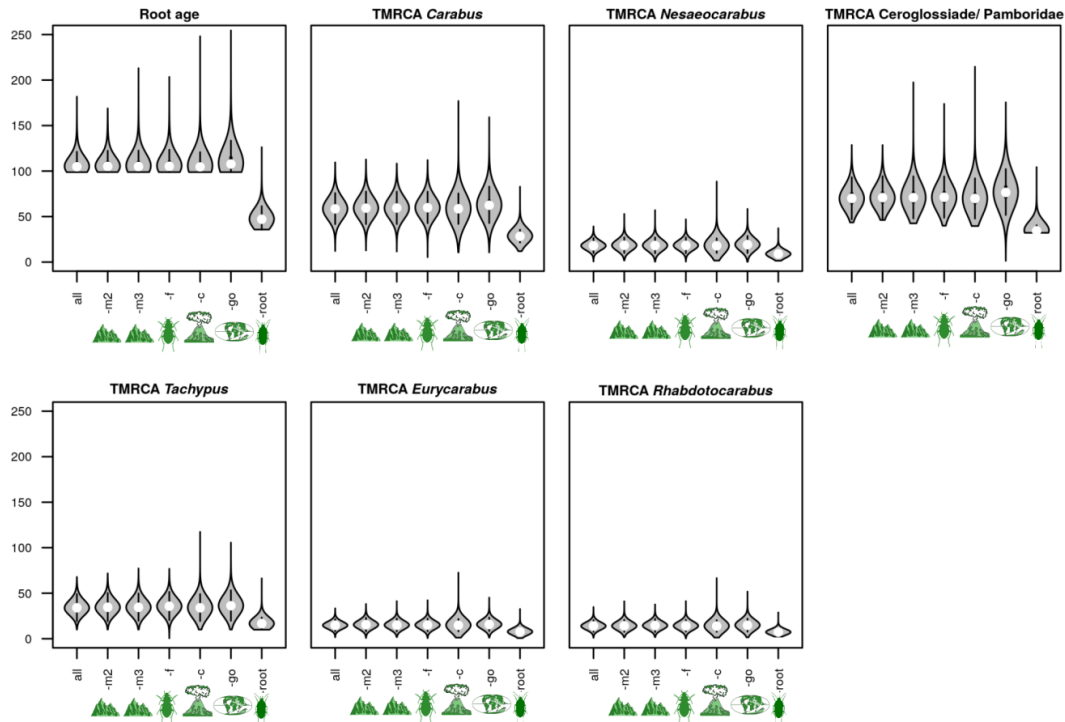

152  
 153 **Figure 2 Violin plots of TMRCA ages in relation to individual calibration points.** The plots depict mean (white  
 154 dots), sd (black bars), 2\*sd (black line), and density distribution (gray shape) of a clade's age as obtained from the  
 155 calibration analyses in **Figure 3** for each major clade in relation to excluding individual calibration points from the  
 156 analysis. The x-axis denotes (letter) and depicts (icon) the respective calibration points.

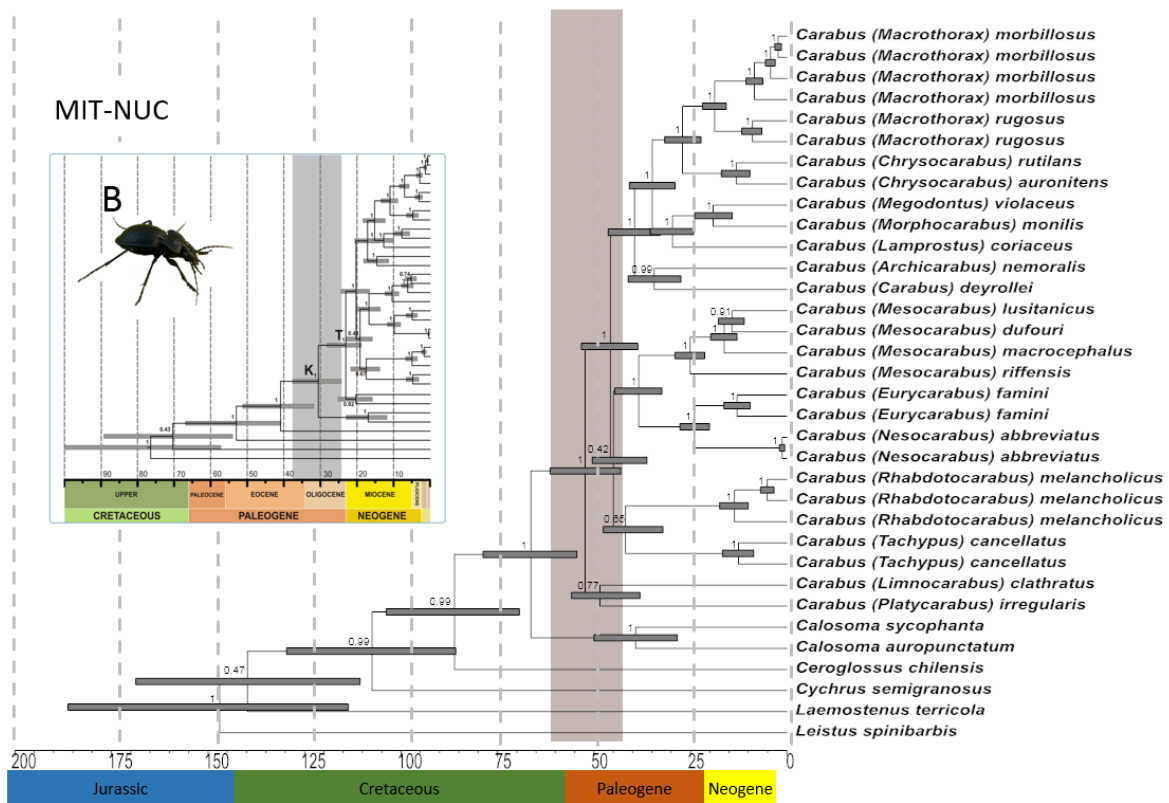

157  
 158 **Figure 3 Ultrametric time-calibrated tree for combined DNA markers (MIT-NUC dataset) of Carabidae.** The figure  
 159 follows [13] (inset) but the time-tree follows the calibration scheme from **Figure 1**. Analyses were conducted in BEAST2  
 160 applying a ULN relaxed clock. Node support are given as Bayesian posterior probabilities. Grey bars on nodes  
 161 represent the 95% confidence intervals for node ages in Ma. The vertical brown bar shows the 95% HPD interval for  
 162 the split between *Carabus* and *Calosoma*. The inset (B) depicts the original figure of the Andujar et al. study.

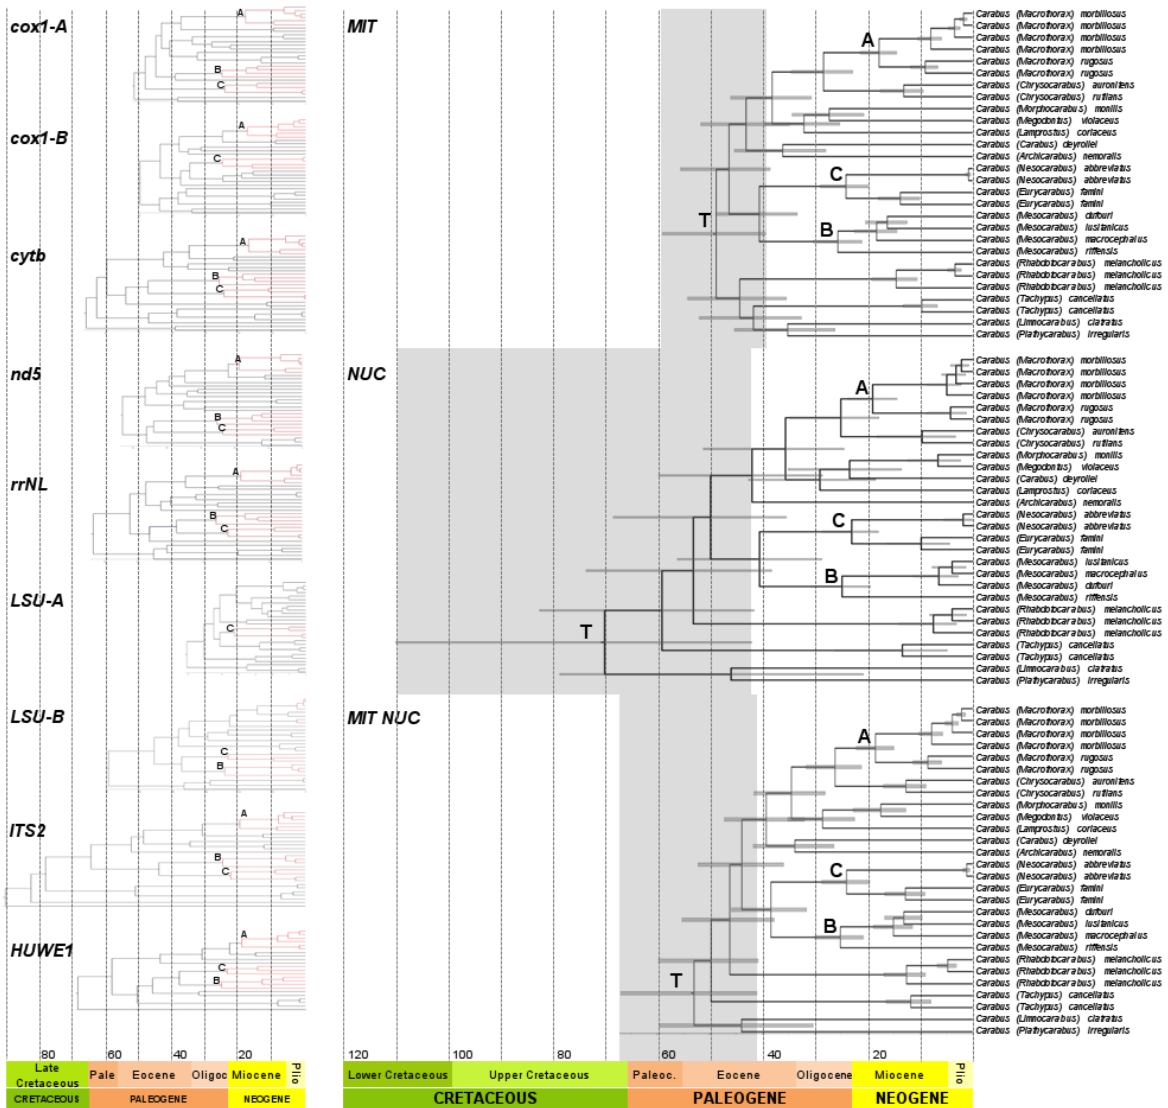

163  
164  
165  
166  
167  
168

**Figure 4 Ultrametric time-calibrated trees obtained with BEAST2 for each individual (left) and combined datasets (right) of the *Carabus* ingroup data set.** Red clades and letters A, B, and C, are given for the individual gene trees when clades were supported by PP of more than 0.8, and for the latter likewise for the concatenated data sets and are equivalent to the dated clades given in **Table 4**. Grey bars indicated the 95% HPD for the respective nodes, with the TMRCA bar being superposed for the respective phylogeny.

169  
170

### 3.2 Time-calibrated gene trees and gene combination trees for the *Carabus* ingroup

171  
172  
173  
174  
175

Lineages A, B, and C were resolved in all gene trees and combination trees except for *cox1-B*, *LSU-A*, and *LSU-B* where B, A-B, and A could not be resolved with adequate posterior probabilities, respectively. The derived TMRCA varied markedly among genes ranging from 35.35 Ma for *LSU-A* and 90.81 Ma for *ITS2*. All medians and 95% HPD intervals for the respective genes and gene sets are given in Table 1.

176

177 **Table 1 Estimates of molecular age of the *Carabus* clade according to gene or gene set.** Estimates were obtained  
 178 from an MCMC run of 100 mio iterations (sampling parameter values and trees every 10,000 iterations, with a burn-in  
 179 of 10%). With the exception of the evolutionary model used, which was inferred by bModelTest during the run, all  
 180 parameters were the same for all analyses.

| gene (set)     | Partition/Clock | This study             |                       | Partition/Clock | Andujar et al. 2012 |                       |
|----------------|-----------------|------------------------|-----------------------|-----------------|---------------------|-----------------------|
|                |                 | median / mean age (Ma) | 95% HPD interval (Ma) |                 | mean age (Ma)       | 95% HPD interval (Ma) |
| <i>cox1-A</i>  | 2P/ULN          | 51.35 / 51.99          | 39.13-66.15           | 2P/SC           | 19.79               | 15.2-24.9             |
| <i>cox1-B</i>  | 2P/ULN          | 49.86 / 50.32          | 37.47-63.92           | 2P/SC           | 21.58               | 16.43-27.71           |
| <i>cytb</i>    | 2P/ULN          | 65.75 / 66.70          | 47.61-86.55           | 2P/SC           | 25.77               | 19.74-32.91           |
| <i>nd5</i>     | 2P/ULN          | 53.18 / 53.66          | 40.06-67.78           | NP/SC           | 20.71               | 15.1-26.15            |
| <i>rrNL</i>    | 2P/ULN          | 63.49 / 65.22          | 41.26-92.18           | NP/SC           | 29.91               | 19.4-42.76            |
| <i>LSU-A</i>   | NP/ULN          | 35.35 / 38.74          | 20.45-66.13           | NP/ULN          | 13.37               | 8.35-24.85            |
| <i>LSU-B</i>   | NP/ULN          | 59.37 / 64.09          | 31.13-107.55          | NP/ULN          | 20.36               | 11.23-36.61           |
| <i>ITS2</i>    | NP/ULN          | 90.81 / 95.43          | 47.84-152.75          | NP/ULN          | 31.17               | 16.8-52.47            |
| <i>HUWE1</i>   | NP/ULN          | 67.85 / 69.93          | 42.85-101.15          | NP/SC           | 30.83               | 21.79-41.36           |
| <i>MIT</i>     | 2P/ULN          | 49.03 / 49.37          | 39.59-59.30           | G-2P/SC         | 21.58               | 17.98-25.4            |
| <i>NUC</i>     | NP/ULN          | 70.56 / 73.56          | 42.44-110.58          | NP/ULN          | 28.5                | 16.97-44.65           |
| <i>MIT NUC</i> | G-2P/ULN        | 53.06 / 53.56          | 41.25-67.05           | G-2P/ULN        | 25.16               | 18.41-33.04           |

## 181 4 Discussion

### 182 Time scale of *Carabus* evolution

183 We here reanalyzed the data presented by Andujar and coworkers [57] in their study on the  
 184 phylogenetic timing of the genus *Carabus* in the light of new fossil records as well as different  
 185 interpretation of the geological record. Our new calibration strategy was based on a review of  
 186 recent geological and biogeographical literature dealing with i) taxa that have a Gondwanan  
 187 distribution, extracting minimum and maximum calibration ages; ii) the onset of the Canary  
 188 hotspot, and iii) the uplift of the Atlas mountains. As expected, our study pushed the crown date  
 189 of *Carabus* well beyond the Oligocene dating of Andujar and coworkers to at least the beginning  
 190 of the Eocene when considering mitochondrial genes, and well into the Cretaceous when  
 191 considering the nuclear genes of this study. Consequently, our findings support the model of  
 192 Penev et al. [15] that species of *Carabus* were already present in the early Cenozoic. In addition,  
 193 our timing of the nuclear data set are in line with previous molecular evidence, that Carabidae is  
 194 an older lineage than Harpalinae [26–28], and thus at least minimizes the supposed phylogenetic  
 195 standstill from 50–60 Ma years to 30–40 Ma years within the Carabidae. Given that we included  
 196 several fossils that were neglected before, it is not surprising that our results reconcile the  
 197 phylogenetic timing of the *Carabus* clade with this existing fossil evidence. That said, the  
 198 Carabidae results now also fall in line with results from other taxa as for example the dating of  
 199 the Pelodyadinae-Phyllomedusinae split at 51.4 Ma (36.4-65.8) linked to the breakaway of  
 200 Australia from South America [10]. We consider this resemblance significant as Anura are known

201 to show congruent evolutionary patterns with ground beetles based on similarly strong habitat  
202 ties [58] and thus this likely is not just a random match.

203 When comparing the impact of the different added calibration points it is evident, that the  
204 inclusion of the Harpalinae Oodini fossil from Burmese amber as the root calibration has by far  
205 the strongest impact. Necessarily, this is true for the dating of the root itself, given that we  
206 implemented this fossil with a hard lower bound. In the extended nd5 calibration analyses this  
207 translates to a difference of almost 50 million years for the root when including or leaving this  
208 calibration point out (see Figure 2). In relation to the younger lineages the root and the other  
209 calibration points produce more congruent results (Figure 4). The pattern has a similar but  
210 weaker trend when comparing the ultrametric time-calibrated trees obtained from the MIT data  
211 and the NUC or the combined MIT/NUC data set (Figure 4). This also implies that the dating of  
212 the internal clades will likely not be pushed back much further, unless new older fossil evidence  
213 will appear. The initial split between *Carabus* and *Calosoma* is situated some 41 and 67 Ma  
214 (Andujar et al: 33-18 Ma [13]), and thus occurred contemporary with the final major phase of the  
215 break up of Laurasia and opening of the northern Atlantic Ocean and therewith, with the split of  
216 the Nearctic and Palearctic regions in this part of the northern hemisphere. Andujar et al. [13]  
217 argued that the much younger *Carabus/Calosoma* split as derived from their analyses is  
218 congruent with the observation that *Carabus* is more diverse in the Palearctic region particularly  
219 due to low dispersal ability of the flightless species. However, the assumption of a flightless  
220 genus *Carabus* does not fit the reality. Since functional hind wings are occasionally present in  
221 the extant species *Carabus (Limnocarabus) clatratus* and particularly in *C. (Carabus) granulatus*  
222 of the more derived Digitulati group, flight capability must have been a trait not only for the most  
223 recent common ancestor (TMRCA) of the genus *Carabus* but for all TMRCA of its major lineages.  
224 Consequently, flight capability has to be assumed as an important precondition for the  
225 colonization of several marginal parts of the genus' distributional area, particularly in the south,  
226 such as the Canary Islands and the Atlas Mountains as discussed in the Material and Methods  
227 section of this study, and it is very probably the precondition for the achievement of trans-  
228 Palearctic and trans-Holarctic distributions in several of the extant lineages. The evolutionary  
229 events that originate the main extant lineages according to our data took place during the Mid  
230 and Late Paleogene and thus much earlier than estimated by Andujar et al. [13] and Deuve et  
231 al. [14], and are probably associated with the reorganization of the terrestrial biomes of the  
232 northern hemispheric regions due to climatic shifts [59] and major geomorphological events in  
233 Central and East Asia resulting from the uplift of the Himalaya-Tibet orogenic system [60–63].  
234 Since *Carabus* beetles are strictly adapted to the temperate climate and are thus absent in the  
235 tropics, climatic shifts might have had major impacts on the early distributional history of the  
236 genus, while the Neogene orogenetic evolution of the northern hemisphere was the main driver  
237 for allopatric diversification within the terminal lineages which resulted in an enormous number  
238 of wingless local endemic species particularly in the mountains of the mid latitudes.

### 239 **Biogeographic Dating in the light of specific life history**

240 Preferences for certain climatic conditions as well as dispersal ability of the species group have  
241 to be considered when geographical events are used to date phylogenetic events. Since  
242 *Carabus* is an extratropical genus with all its species being strictly adapted to the warm  
243 temperate or colder climates, there is no doubt about the origin of the genus *Carabus* in the  
244 northern parts of today's Palearctic region. However, up to today there is no clear evidence for  
245 a more detailed geographical origin. Previous molecular phylogenetic studies of the genus by  
246 Deuve et al. [14] show a simultaneous appearance of western (*Arcifera*, *Tachypus*) and eastern  
247 Palearctic elements (*Crenolimbi*, *Spinulati*) at the base of the *Carabus* tree. Reconstructing the  
248 early distributional history of the genus is more difficult since active dispersal by flight has to be  
249 assumed for the ancestors of most of the extant clades as discussed in the previous section.  
250 However, previous phylogenetic studies were probably biased by the author's preoccupation with  
251 extant *Carabus* species being 99% wingless and thus underestimated the true historical  
252 dispersal ability of the species. E.g., emergence of the subgenus *Nesaeocarabus* on the Canary  
253 Islands, which is one of the dating points in previous phylogenetic studies of the genus [13][14],



254 has to be considered under the light of active dispersal from North Africa or southwestern Europe  
255 by flight. Dispersal by flight is likewise a most probable explanation for Europe-North Africa trans-  
256 mediterranean distributional patterns as observed in the subgenera *Eurycarabus* and  
257 *Raptocarabus*. However, previous authors very probably assume dispersal “on foot” because  
258 the desiccation of the Strait of Gibraltar during the Messinian crisis (about 6-5 Ma) and thus a  
259 short period of terrestrial connection of the continents was considered the prerequisite of the  
260 dispersal of the respective lineages [13][14]. In the Material and Method section we have  
261 summarized arguments to reject this scenario since it is in strong contrast to the habitat  
262 preferences of the species. If active dispersal by flight is taken into account while discussing the  
263 dispersal history of the genus, or using vicariance in biogeographic dating, emergence and  
264 distribution of humid temperate habitats should be considered a much more important factor than  
265 terrestrial pathways. Consequently, with respect to the trans-mediterranean distributional  
266 patterns in some of the *Carabus* lineages, in pre-Pliocene times the distribution of mountainous  
267 areas as the provider of humid temperate habitats in the Mediterranean region, such as the Atlas  
268 Mts., can be seen as the most important clue for the distribution of potential paleohabitats of the  
269 species.

## 270 5 Conclusions

271 Our study stresses the general need of a more differentiated and transparent usage of geological  
272 calibration points depending on life history traits and habitat requirements of the taxa under study.  
273 Geological events need to be strictly interpreted from a biogeographic perspective including  
274 taxon specific habitat suitability and taxon specific dispersal barriers. Too often, geological events  
275 such as Messinian salinity crisis or the opening/closing of the straight of Gibraltar are transferred  
276 uncritically from a taxon where they might have enacted significant evolutionary pulses to taxa  
277 where they don't. In the here presented case of the dating of the *Carabus* clade, our study shows  
278 that such a more balanced reflection of taxon specific biogeographic features results in a much  
279 earlier TMRC age of this clade.

## 280 6 Methods

### 281 6.1 Phylogenetic data sets

282 For direct comparability of dating results, three phylogenetic data sets presented by Andujar [13]  
283 were utilized here based on the alignments deposited from Andujar and coworkers at treebase  
284 under the submission number 12410: [http://purl.org/phylo/tree-](http://purl.org/phylo/treebase/phyloids/study/TB2:S12410)  
285 [base/phyloids/study/TB2:S12410](http://purl.org/phylo/treebase/phyloids/study/TB2:S12410).

286 In short, the first data set is based on nd5 sequences from 58 Carabidae species and will be  
287 referred to as the extended nd5 dataset. It includes 57 species of the supertribe Carabitae, with  
288 51 species of the genus *Carabus* representing 16 subgenera and seven of the 13 main *Carabus*  
289 clades identified by Deuve et al. [14], one species each of the genera *Calosoma*, *Ceroglossus*,  
290 *Maoripamborus*, *Cychrus*, and two species of *Pamborus*, and the Harpalinae species *Abax*  
291 *parallelepipedus* as outgroup taxon.

292 The second data set included 34 specimens of the Carabidae family, including 19 species of the  
293 genus *Carabus*, two species of its sister taxon *Calosoma*, one species each of *Ceroglossus*,  
294 *Cychrus* (representatives of the supertribe Carabitae), as well as the Nebriitae species *Leistus*  
295 *spinibarbis* and the Harpalinae species *Laemostenus terricola* as outgroup taxa. Alignments  
296 were available for the mitochondrial genes *cox1-A*, *cox1-B*, *nd5*, *cytb*, *rrnL* and the nuclear genes  
297 *LSU-A*, *LSU-B*, *ITS2*, and *HUWE1*. A third data set is a subset of this second data set and only  
298 includes the ingroup, i.e. *Carabus* species.

## 299 6.2 Calibration strategy

300 In Table 2, the calibration scheme from Andujar et al. [13] used on the nd5 extended data set is  
 301 shown. Table 3 shows the equivalent calibration scheme used in this study. Specifically, we follow  
 302 the Andujar approach only in relation to the *Carabus (Tachypus) cancellatus* fossil from France  
 303 (F). Our treatment of the other calibration priors will be explained in the next paragraphs. Similar  
 304 as in Andujar et al. [13] we used the resulting calibrated phylogeny to obtain ages for three well-  
 305 supported cladogenetic events in the phylogeny of *Carabus* taking on the identical nomenclature  
 306 for the respective splits between *Carabus (Macrothorax) rugosus* and *C. (Macrothorax)*  
 307 *morbillosus* (Node A), *C. (Mesocarabus) riffensis* from the European *Mesocarabus* clade (Node  
 308 B), and the split between the sister subgenera *Eurycarabus* and *Nesaeocarabus* (Node C).  
 309 These nodes were selected by Andujar and coworkers because they are not (i) affected by  
 310 systematic conflict, are (ii) old enough to avoid time dependence effects, and (iii) not excessively  
 311 affected by saturation of molecular change. We used TreeStat 1.7.1 [48] to recover node ages  
 312 from the sample of the MCMC search in BEAST and used the R MASS package [36] to obtain  
 313 the gamma function with the “fitdistr” function (Table 4).

314 **Table 2 Calibration scheme from Andujar et al. 2012** [13]. Denomination of the evolutionary events follows the  
 315 Andujar study.

| Evolutionary event: node                                                                                                        | Calibration event                            | Event age (Ma) | Priors on node ages                                                | Prior 95% age interval |
|---------------------------------------------------------------------------------------------------------------------------------|----------------------------------------------|----------------|--------------------------------------------------------------------|------------------------|
| Split between two Canarian endemic species: <i>Carabus (Nesaeocarabus) coarctatus</i> and <i>C. (N.) abbreviates</i> : <b>C</b> | Volcanic emergence of Gran Canaria           | 14.5           | Uniform (a = 0, b = 14.5)                                          | 0.03-14.14             |
| <i>Carabus (Tachypus) cancellatus</i> fossil: <b>F</b>                                                                          | Messinian deposits of Cantal (France)        | 5              | Lognormal ( $\mu = 25$ , $\sigma = 1.5$ , offset = 5)              | 5.4-158.5              |
| Radiation of <i>Damaster</i> : <b>J1</b>                                                                                        | Final disconnection of Japan from mainland   | 3.5            | Truncated Normal ( $\mu = 3.5$ , $\sigma = 1$ , a = 0.1, b = 1000) | 1.55-5.46              |
| Radiation of <i>Leptocarabus</i> : <b>J2</b>                                                                                    | Final disconnection of Japan from mainland   | 3.5            | Truncated Normal ( $\mu = 3.5$ , $\sigma = 1$ , a = 0.1, b = 1000) | 1.55-5.46              |
| Radiation of <i>Ohomopterus</i> : <b>J3</b>                                                                                     | Final disconnection of Japan from mainland   | 3.5            | Truncated Normal ( $\mu = 3.5$ , $\sigma = 1$ , a = 0.1, b = 1000) | 1.55-5.46              |
| Split between subgenus <i>Isiocarabus</i> and <i>Ohomopterus</i> : <b>J4</b>                                                    | Initial disconnection of Japan from mainland | 15             | Normal ( $\mu = 15$ , $\sigma = 1$ )                               | 13.04-16.96            |
| Split between <i>Carabus (Eurycarabus) genei</i> from Corsica and North African <i>Eurycarabus</i> : <b>M2</b>                  | Opening Gibraltar strait                     | 5.33           | Exponential ( $\mu = 0.5$ , offset = 5.3)                          | 5.31-7.14              |
| Split between two <i>Carabus (Rhabdotocarabus) melancholicus</i> subspecies: <b>M3</b>                                          | Opening Gibraltar strait                     | 5.33           | Exponential ( $\mu = 0.5$ , offset = 5.3)                          | 5.31-7.14              |

### 316 6.2.1 Canary Islands prior

317 After decades of debate, the origin of the Canary Islands has been firmly attributed to the Canary  
 318 Hotspot through the discovery of nannofossils proving an age succession of the islands [37].  
 319 Consequently, the colonization of the Canary Islands should not be constrained to the age of  
 320 Gran Canaria, as a hotspot origin necessarily means that island habitats could have been  
 321 present since the upstart of the respective hotspot. Previously, the age of the Canary Hotspot  
 322 has been proposed to be 60 Ma based on Kinematic studies [38]. Consequently, we set the prior  
 323 on the split between the two Canarian endemics *Carabus (Nesaeocarabus) coarctatus* and *C.*  
 324 *abbreviates* to 60 Ma using a uniform distribution as no additional information is available that  
 325 would favour a specific time.

## 326 **6.2.2 Japan prior**

327 We omit the four calibration points from Japan following the logic, that neither the final nor the  
328 initial disconnection of Japan from the mainland is mandatory for the radiation of the *Carabus*  
329 lineages *Damaster*, *Leptocarabus*, and *Ohomopterus*, and the split between *Isiocarabus* and  
330 *Ohomopterus*, respectively, but the availability of their habitat. The Asian Far East with the dense  
331 ensemble of the complex folding systems of Kamchatka, Sikhote Alin, the Sakhalin and Korean  
332 peninsulas, the Japanese Islands, and the Kurile island arc, was geomorphologically highly  
333 diverse long before the initial disconnection of Japan [39, 40]. Therefore, during the Late  
334 Cenozoic, occurrence of suitable habitats for temperate *Carabus* has to be assumed particularly  
335 along slopes of the many, more or less separated mountain arcs and volcanos of the area.  
336 Consequently, it is highly probable that separation of the lineages was linked to the particular  
337 geomorphology of the area and therewith, has predated the splitting events of the Japanese  
338 Islands from continental Asia markedly. We therefore conclude that with respect to the  
339 biogeographical history of ground beetles and other soil arthropods these geological events are  
340 not suitable calibration events.

## 341 **6.2.3 Gibraltar Strait vs. Atlas uplift**

342 The genus *Carabus* is an extratropical group of beetles with its representatives adapted to the  
343 warm (meridional) to cold temperate or subarctic climates. The species are mesophilic or  
344 hygrophilic and are absent in deserts. Temperature and humidity preferences of the beetles have  
345 to be considered when using occurrences of land bridges in the past such as the closing of the  
346 Gibraltar Strait to hypothesize dispersal events. So far, there is no paleoecological indication (let  
347 alone evidence) that the climate in the depression of the Gibraltar Strait was suitable for *Carabus*  
348 during the terrestrial development of the area in the Messinian. Instead, it was hot and dry, with  
349 occurrence of spacious salt marshes, while warm temperate conditions and occurrence of  
350 mesophilic forests were characteristic along slopes of the mountain belts [41, 42]. Mountains  
351 with various suitable habitats had been uplifted on both sides of the Gibraltar Strait much earlier.  
352 In addition, based on the current molecular phylogenetic data it has to be assumed that the  
353 ancestors of both *Carabus* subgenera *Eurycarabus* and *Rhapdotocarabus* were capable to fly  
354 since fully developed hind wings are occasionally present in *Carabus granulatus* of the more  
355 derived Digitulati group [14]. Consequently, multiple developments of winglessness in the  
356 evolution of *Carabus* have to be inferred. If active dispersal by flight was possible for ancestors  
357 of the taxa in question, the uplift of the Atlas Mountains thus was an important event with respect  
358 to the evolution of the North African *Rhapdotocarabus melancholicus* clade and the North African  
359 *Eurycarabus*. Consequently, this scenario is completely independent of opening and closing of  
360 the Gibraltar Strait. Therefore, we constrained this split with the geological age for the uplift phase  
361 of the current Atlas Mountains. This uplift has been attributed to Cenozoic thickening of the crust  
362 and Middle to Late Miocene thinning of the mantle lithosphere related to a shallow mantle plume  
363 [43, 44]. A significant part of the paleoelevations have been attributed to this latter mechanism,  
364 namely a third of the mean altitude of 1,500 m in the western High Atlas, and half of the mean  
365 2,000 m in the central High Atlas [43]. To be on the side of caution, we argue, that potentially it  
366 was this latest uplift phase that pushed the Atlas into sufficient heights for suitable *Carabus*  
367 habitats to develop. Likewise arguing from the side of caution, we do not consider the age of the  
368 Anti-Atlas that goes back to the end of the Carboniferous to be the likely starting point, also given  
369 that none of the relevant species groups have been documented for the Anti-Atlas (though it  
370 would of course have been possible that they occurred there before or simply have not been  
371 detected yet). We therefore use a lognormal distribution that puts a much greater likelihood on  
372 the younger dates of the liftup of the Atlas system as compared to the older Anti-Atlas. Finally,  
373 the lognormal distribution is offset to the starting point of the Atlas uplift since arrival of the  
374 respective ancestors and separate evolution of the North African lineages could not have started  
375 before the Atlas system had reached into significant heights with suitable habitats.

376

#### 377 **6.2.4 Split of Australia from Antarctica/South America**

378 The breakup of Gondwana has been reflected in a number of ways in biogeographic and  
379 phylogeographic reconstructions. For example, Upchurch [45] proposed four broadly different  
380 models namely Sanafrica model, Africa-first model, Pan-Gondwana model and trans-oceanic  
381 dispersal. However, here we are only interested in the split of Australia from Antarctica or  
382 Antarctica and South America to reflect the split between *Pamborus* with its Australian  
383 distribution and *Maoripamborus* with its New Zealand distribution (together forming the tribe  
384 Pamborini) from *Ceroglossus* (forming the monotypic tribe Ceroglossini) with its South-  
385 American distribution. Numerous studies have found reticulate histories along the split of  
386 Australia between the Late Cretaceous and the Eocene when a shallow seaway between  
387 Australia and Antarctica likely was the last land passage between these continents [10]. Lately,  
388 it was proposed that this final split was a diachronous sea-floor spreading that started in the  
389 West 93-87 Ma, progressing to central Great Australia 85-83 Ma, followed by separation in the  
390 western Bight at ~65 Ma and finalizing in the Terre Adelie-Otway region ~50 Ma (summarized  
391 in [46]). The same authors discuss that there still is large uncertainty in connection with this  
392 break-up history and propose that the oldest confident interpretations of magnetic seafloor  
393 anomalies date to ~45 Ma when Australia and Antarctica finally drifted apart [46]. However, the  
394 South Tasman Rise was already submerged between 50 to 32 Ma as deep as 1000 m [47]  
395 making passage unlikely for beetles. In summary, we again implement a conservative dating  
396 approach in relation to *Carabus* by choosing a calibration age with a minimum split at 32 Ma. In  
397 addition, we set the maximum age to 159 Ma following Andujar et al. [13] and Deuve et al. [14].  
398 This date is attributed to the oldest fossils which most definitely belong to the Carabidae, and  
399 are described from the Upper Jurassic of Kazakhstan [24]. The much older fossil *Lithorabus*  
400 *incertus* from the Lower Jurassic of Kyrgyzstan was also described within the Carabidae family  
401 (#), but it is based on a very poor imprint of few parts of the exoskeleton which is why the  
402 systematic assignment is rather doubtful. We chose a lognormal distribution (see Table 2).

#### 403 **6.2.5 Fossil evidence for Harpalinae**

404 As Carabidae outgroup taxon, Andujar et al. [13] used *Abax parallelepipedus* for their nd5 data  
405 analyses. The genus *Abax* Bonelli is representative of the Pterostichini tribe of the ground beetle  
406 subfamily Harpalinae *sensu* Crowson [48] which includes by far the most species of Carabidae.  
407 Morphological and molecular genetic phylogenies consistently indicate the terminal position of  
408 Harpalinae within Carabidae [26, 28, 49]. Harpalinae fossils are described from Upper  
409 Cretaceous deposits in South Kazakhstan, Beletin formation, Turonian (93.5-89.0 Ma [50]), and  
410 from the Burmese amber (ca. 99 Ma [25]). With respect to the evolutionary history of Harpalinae,  
411 the occurrence of a representative of the Oodini tribe in the Burmese amber deposits which are  
412 dated to the lowermost Upper Cretaceous [51] is particularly remarkable. It is an important hint  
413 that the subfamily was already present with rather derived lineages during that time. Therefore,  
414 we set the prior for the Harpalinae to 98 Ma (see Table 3), again with a maximum age of 158.5  
415 following the same logic as described in 3.2.4.

416

417 **Table 3 Calibration strategy of this study.** Denomination of the evolutionary events follows the Andujar study [13]  
418 for better comparability.

| Evolutionary event: node                                                                                                     | Calibration event                                   | Event age (Ma) | Priors on node ages                                         | Prior 95% age interval |
|------------------------------------------------------------------------------------------------------------------------------|-----------------------------------------------------|----------------|-------------------------------------------------------------|------------------------|
| C   Split between two Canarian endemic species: <i>Carabus</i> ( <i>Nesaeocarabus</i> ) <i>coarctatus</i> and <i>C. (N.)</i> | Volcanic emergence of the Canary Hotspot            | 60             | Uniform (upper = 60, lower = 0, offset = 0)                 | 1.5 – 58.5             |
| F   <i>Carabus</i> ( <i>Tachypus</i> ) <i>cancellatus</i> fossil                                                             | Messinian deposits of Cantal (France)               | 5              | Lognormal ( $\mu = 25$ , $\sigma = 1.5$ , offset = 5)       | 5.43 – 159.0           |
| M2   Split between <i>Carabus</i> ( <i>Eurycarabus</i> ) <i>genei</i> from Corsica and North African <i>Eurycarabus</i> .    | Surface uplift of the Atlas                         | 15             | Lognormal ( $\mu = 15$ , $\sigma = 0.5$ , offset = 0)       | 4.97 – 35.30           |
| M3   Split between two <i>Carabus</i> ( <i>Rhabdotocarabus</i> ) <i>melancholicus</i> subspecies                             | Surface uplift of the Atlas                         | 15             | Lognormal ( $\mu = 15$ , $\sigma = 0.5$ , offset = 0)       | 4.97 – 35.30           |
| GO   Split from Pamborini and Ceroglossini                                                                                   | Split of Australia between Antarctica/South America | 32-50          | Lognormal ( $\mu = 78$ , $\sigma = 0.41$ , offset=0)        | 32.1 – 159.0           |
| RO   Root                                                                                                                    | Fossil Oodini in Burmese amber                      | 98.79 +- 0.62  | Lognormal ( $\mu = 130$ , $\sigma = 4.27$ , offset = 98.17) | 98.2 – 159.0           |

419

420 **Table 4 Calibration points employed to time-calibrate molecular phylogenies of single and combined datasets**  
421 **in *Carabus*.** Median age and 95% HPD interval for the three clades were taken from the calibration analyses of the  
422 nd5 gene with BEAST2 (version 2.5.2) extracted with Tracer v 1.7.1. Gamma distribution was derived with the fitdistr  
423 function from the R package MASS.

| Node | Cladogenetic event                                                                                | Median Age and 95% HPD interval (Ma) | Gamma distribution        |
|------|---------------------------------------------------------------------------------------------------|--------------------------------------|---------------------------|
| A    | Split between <i>Carabus</i> ( <i>Macrothorax</i> ) <i>rugosus</i> and <i>C. (M.) morbillosus</i> | 19.189 (13.159-25.639)               | Shape 55.565; Scale 0.368 |
| B    | Split of <i>C. (Mesocarabus)</i> <i>riffensis</i> from European <i>Mesocarabus</i>                | 25.950 (18.681-33.969)               | Shape 63.594; Scale 0.407 |
| C    | Split between <i>Eurycarabus</i> and <i>Nesaeocarabus</i>                                         | 23.990 (17.748-31.669)               | Shape 58.669; Scale 0.401 |

### 424 6.3 Calibration analyses with assessment of the input of each calibration point

425 All phylogenetic analyses were conducted with BEAST2 (version 2.5.2, [52]) and were run on  
426 the CIPRES Cyberinfrastructure for Phylogenetic Research [53]. To assess the relative  
427 contribution of each calibration point of the respective priors, we ran seven analyses by removing  
428 one of the individual calibration points from Table 3 in each of the runs, and one run with all priors  
429 included. Individual calibration point impact was assessed using violin plots produced with the R  
430 package vioplot [54]. In all approaches, we constrained *Calosoma* to be the sister clade to  
431 *Carabus*, and used *Abax* as outgroup since these relationships have been well established [26,  
432 49]. Nucleotide substitution models were inferred during the MCMC analysis with bModelTest  
433 package [55] implemented in BEAST2. Otherwise we followed the settings as in [13] and used  
434 a Yule process as model of speciation, a strict molecular clock and a random tree as starting  
435 tree. Each run was performed with 100 million generations, sampling 10.000 trees and with a  
436 burn-in set to 10% of the samples. Convergence and stationary levels were verified with Tracer  
437 v1.7.1 [56]. We annotated the tree information with TreeAnnotator v.2.5.2 and visualized it with  
438 FigTree v.1.4.2.

439

## 440 **6.4 Calibration analyses of each marker and their combination**

441 The analyses of time-calibrated phylogenies employing nodes A-C as indicated above generally  
442 followed Andujar et al.[13]. In short, a time calibrated phylogenetic reconstruction of each  
443 individual gene as well as the combinations of i) all mitochondrial genes, ii) all nuclear genes,  
444 and iii) all mitochondrial and nuclear genes were based on a run of 100 million generations.  
445 Subsequent steps followed the same protocol as in 3.3 (see above). Mean, standard error,  
446 highest posterior density intervals (HPD 95%), and effective sample size of likelihood,  
447 evolutionary rates and the TMRCA of *Carabus* were inspected using Tracer 1.7.1. Consensus  
448 trees were obtained in TreeAnnotator 2.5.2 [44] using the median age option. In all instances an  
449 uncorrelated lognormal (ULN) relaxed clock was employed. All mitochondrial data sets were  
450 analysesd under a 2P codon partition scheme with site models and clock models unlinked.

## 451 **7 Funding**

452 The study was supported by Grants of the German Research Council (DFG) to Lars Opgenoorth  
453 (OP-219/2-1) and Joachim Schmidt (SCHM-3005/1-1).

### 454 **7.1 Authors' contributions**

455 All three authors contributed to all parts of the manuscript and read and approved the final  
456 manuscript.

457

## 458 **8 References**

- 459 1. Dos Reis M, Donoghue PCJ, Yang Z. Bayesian molecular clock dating of species divergences  
460 in the genomics era. *Nat Rev Genet.* 2016;17:71–80.
- 461 2. Duchêne S, Lanfear R, Ho SYW. The impact of calibration and clock-model choice on  
462 molecular estimates of divergence times. *Mol Phylogenet Evol.* 2014;78:277–89.
- 463 3. Schmidt J, Belousov I, Michalik P. X-ray microscopy reveals endophallic structures in a new  
464 species of the ground beetle genus *Trechus* Clairville, 1806 from Baltic amber (Coleoptera,  
465 Carabidae, Trechini). *Zookeys.* 2016;2016:113–27.
- 466 4. Schmidt J, Michalik P. The ground beetle genus *Bembidion* Latreille in Baltic amber : Review  
467 of preserved specimens and first 3D reconstruction of endophallic structures using X-ray  
468 microscopy ( Coleoptera , Carabidae , Bembidiini ). 2017;126:101–26.
- 469 5. Renner SS. Available data point to a 4-km-high Tibetan Plateau by 40 Ma, but 100 molecular-  
470 clock papers have linked supposed recent uplift to young node ages. *J Biogeogr.* 2016;43:1479–  
471 87.
- 472 6. Sanmartín I, Ronquist F. Southern hemisphere biogeography inferred by event-based models:  
473 Plant versus animal patterns. *Syst Biol.* 2004;53:216–43.
- 474 7. Brundin L. Transantarctic relationships and their significance, as evidenced by Chironomid  
475 midges. *Kunglige Svenska Vetenskapsakademiens Handlingar. Fjärde Series 11, 1-472.*  
476 *Burbridge, NT (1960). The phytogeography of the Australian region. Aust J Bot.* 1966;8:75–212.
- 477 8. McCulloch GA, Wallis GP, Waters JM. A time-calibrated phylogeny of southern hemisphere  
478 stoneflies: Testing for Gondwanan origins. *Mol Phylogenet Evol.* 2016;96:150–60.
- 479 9. Sharma PP, Baker CM, Cosgrove JG, Johnson JE, Oberski JT, Raven RJ, et al. A revised  
480 dated phylogeny of scorpions: Phylogenomic support for ancient divergence of the temperate  
481 Gondwanan family Bothriuridae. *Mol Phylogenet Evol.* 2018;122 January:37–45.
- 482 10. Frazão A, Da Silva HR, De Moraes Russo CA. The gondwana breakup and the history of the  
483 atlantic and indian oceans unveils two new clades for early neobatrachian diversification. *PLoS*  
484 *One.* 2015;10:1–18.
- 485 11. Swenson U, Hill RS, McLoughlin S. Biogeography of *Nothofagus* Supports the Sequence of  
486 Gondwana Break-up Author ( s ): Ulf Swenson , Robert S . Hill and Stephen McLoughlin  
487 Published by: International Association for Plant Taxonomy ( IAPT ) Stable URL :  
488 <https://www.jstor.org/stable/1224719>. 2018;50:1025–41.
- 489 12. Cook LG, Crisp MD. Not so ancient: The extant crown group of *Nothofagus* represents a  
490 post-Gondwanan radiation. *Proc R Soc B Biol Sci.* 2005;272:2535–44.
- 491 13. Andujar C, Serrano J, Gomez-Zurita J. Winding up the molecular clock in the genus *Carabus*  
492 ( Coleoptera : Carabidae ): assessment of methodological decisions on rate and node age  
493 estimation. *BMC Evol Biol.* 2012;12:1–16.
- 494 14. Deuve T, Cruaud A, Genson G, Rasplus JY. Molecular systematics and evolutionary history  
495 of the genus *Carabus* (Col. Carabidae). *Mol Phylogenet Evol.* 2012;65:259–75.
- 496 15. Penev L, Casale A, Turin H. Chapter 8 Biogeography. In: Turin H, Penev L, Casale A, editors.  
497 *The Genus Carabus in Europe.* Sofia-Moscow: Pensoft Publishers; 2003. p. 327–69.
- 498 16. Deuve T. *Illustrated Catalogue of the Genus Carabus of the World.* Sofia-Moscow: Pensoft  
499 Publishers; 2004.

- 500 17. Erwin TL. A treatise of the western hemisphere Caraboidea (Coleoptera). Their classification,  
501 distributions, and way of life. Volume I. Sofia-Moscow: Pensoft Publishers; 2007.
- 502 18. Bousquet I, Brezina A, Davies J, Farkac J, Smetana A. Tribe Carabini. In: Löbl I, Löbl D,  
503 editors. Catalogue of Palaearctic Coleoptera. Volume 1. Revised and Updated Edition.  
504 Archostemata – Myxophaga – Adephaga. Brill, Leiden: Pensoft Publishers; 2017. p. 63–207.
- 505 19. Prüser F, Mossakoski D. Conflicts in phylogenetic relationships and dispersal history of the  
506 supertribe Carabitaie (Coleoptera: Carabidae). In: BALL GE, Casale A, Taglianti AV, editors.  
507 Phylogeny and classification of Caraboidea (Coleoptera: Adephaga). Torino: Museo Regionale  
508 die Scienze Naturali; 1998. p. 297–328.
- 509 20. Erwin TL. Thoughts on the Evolutionary History of Ground Beetles: Hypotheses Generated  
510 from Comparative Faunal Analyses of Lowland Forest Sites in Temperate and Tropical Regions.  
511 In: Erwin TL, Ball GE, Whitehead DR, editors. Carabid Beetles: Their Evolution, Natural History,  
512 and Classification. 1st edition. The Hague: Dr. W. Junk bv Publishers; 1979. p. 539–92.
- 513 21. Ortuño VM. Zootaxa, Fossil carabids from Baltic amber... Zootaxa. 2009;61:55–61.
- 514 22. Gamboa S, Ortuño VM. A new fossil species of the genus Coptodera Dejean, 1825  
515 (Coleoptera: Carabidae: Lebiinae) from Baltic amber. Zootaxa. 2015;3981:592–6.
- 516 23. Schmidt J. Eocene age of Limodromus Motschulsky, 1850, with description of L.  
517 hoffeinsorum sp. n. from Baltic Amber (Coleoptera, Carabidae, Platynini). Zootaxa.  
518 2015;3974:573–81.
- 519 24. Ponomarenko AG. Suborder Adephaga. In: Arnold'di L V, Zherikhin V V, Nikritin LM,  
520 Ponomarenko AG, editors. Mezozoiskie Zhestkokrylye1. Moscow: Nauka Publishers; 1977. p.  
521 17–104.
- 522 25. Liu Y, Shi H, Cai C, Liang H, Huang D. The first record of Cretaceous ground beetle  
523 (Coleoptera: Carabidae: Oodini) from Burmese amber. Cretac Res. 2015;52 PB:427–30.
- 524 26. Maddison D, Baker M, Ober K. Phylogeny of carabid beetles as infered from 18S ribosomal  
525 DNA (Coleoptera: Carabidae). Syst Entomol. 1999;24:103–38.
- 526 27. Maddison DR, Moore W, Baker MD, Ellis TM, Ober KA, Cannone JJ, et al. Monophyly of  
527 terrestrial adephagan beetles as indicated by three nuclear genes (Coleoptera: Carabidae and  
528 Trachypachidae). Zool Scr. 2009;38:43–62.
- 529 28. López-López A, Vogler AP. The mitogenome phylogeny of Adephaga (Coleoptera). Mol  
530 Phylogenet Evol. 2017;114:166–74.
- 531 29. Ober KA, Heider TN. Phylogenetic diversification patterns and divergence times in ground  
532 beetles (Coleoptera: Carabidae: Harpalinae). BMC Evol Biol. 2010;10.
- 533 30. Ober KA. Rapid Diversification and Evolution in Ground Beetles. Am Entomol. 2011;57:47–  
534 9.
- 535 31. Faille A, Casale A, Balke M, Ribera I. A molecular phylogeny of Alpine subterranean Trechini  
536 (Coleoptera: Carabidae). BMC Evol Biol. 2013;13.
- 537 32. Faille A, Andújar C, Fadrique F, Ribera I. Late Miocene origin of an Ibero-Maghrebian clade  
538 of ground beetles with multiple colonizations of the subterranean environment. J Biogeogr.  
539 2014;41:1979–90.
- 540 33. Faille A, Bourdeau C, Belles X, Fresneda J. Allopatric speciation illustrated: The hypogean  
541 genus Geotrechus Jeannel, 1919 (Coleoptera: Carabidae: Trechini), with description of four new  
542 species from the Eastern Pyrenees (Spain). Arthropod Syst Phylogeny. 2015;73:439–55.



- 543 34. López-López A, Abdul Aziz A, Galián J. Molecular phylogeny and divergence time estimation  
544 of *Cosmodela* (Coleoptera: Carabidae: Cicindelinae) tiger beetle species from Southeast Asia.  
545 Zool Scr. 2015;44:437–45.
- 546 35. Mossakowski D. The mandible of Maoripamborus: An indication of convergent evolution in  
547 Cychrini and Pamborini. In: Szyszkó J, editor. How to protect or what we know about carabid  
548 beetles. Warsaw: Warsaw Agricultural University Press; 2002. p. 95–100.
- 549 36. Venables WN, Ripley BD. Modern Applied Statistics with S. Fourth Edi. New York: Springer;  
550 2002.
- 551 37. Troll VR, Deegan FM, Burchardt S, Zaczek K, Carracedo JC, Meade FC, et al. Nannofossils:  
552 The smoking gun for the Canarian hotspot. Geol Today. 2015;31:137–45.
- 553 38. Holik JS, Rabinowitz PD. Effects of Canary hotspot volcanism on structure of oceanic crust  
554 off Morocco. J Geophys Res. 1991;96:39–67.
- 555 39. Chain VE, Koronovskij N. Nordasien. Stuttgart: Enke; 1995.
- 556 40. Springs W, Carlo M. Philosophy, history. 1992; Manly 1991.
- 557 41. Bertolani-Marchetti D. Pollen paleoclimatology in the Mediterranean since Messinian time.  
558 In: Stanley DJ, Wezel FC, editors. Geological evolution of the Mediterranean Basin. New York,  
559 Berlin, Heidelberg, Tokyo: Springer; 1985. p. 589.
- 560 42. Mai DH. Tertiäre Vegetationsgeschichte Europas. Methoden und Ergebnisse. Jena, Stuttgart,  
561 New York: Gustav Fischer; 1995.
- 562 43. Missenard Y, Zeyen H, de Lamotte DF, Leturmy P, Petit C, Sébrier M, et al. Crustal versus  
563 asthenospheric origin of relief of the Atlas mountains of Morocco. J Geophys Res Solid Earth.  
564 2006;111:1–13.
- 565 44. Babault J, Teixell A, Arboleya ML, Charroud M. A late Cenozoic age for long-wavelength  
566 surface uplift of the Atlas Mountains of Morocco. Terra Nov. 2008;20:102–7.
- 567 45. Upchurch P. Gondwanan break-up: legacies of a lost world? Trends Ecol Evol. 2008;23:229–  
568 36. doi:10.1016/j.tree.2007.11.006.
- 569 46. White LT, Gibson GM, Lister GS. A reassessment of paleogeographic reconstructions of  
570 eastern Gondwana: Bringing geology back into the equation. Gondwana Res. 2013;24:984–98.
- 571 47. van den Ende C, White LT, van Welzen PC. The existence and break-up of the Antarctic land  
572 bridge as indicated by both amphi-Pacific distributions and tectonics. Gondwana Res.  
573 2017;44:219–27.
- 574 48. Crowson RA. The natural classification of the families of Coleoptera. London: Lloyd; 1955.
- 575 49. Beutel R. Über Phylogenese und Evolution der Coleoptera (Insecta), insbesondere der  
576 Adephaga. Abhandlungen des Naturwissenschaftlichen Vereins Hambg. 1997;31:3–164.
- 577 50. Ponomarenko AG. Description of new taxa. Suborder Adephaga [in Russian]. In:  
578 Mezozoiskie Zhestkokrylye. Akademiya Nauk SSSR, Trudy Paleontologicheskogo Instituta.  
579 Moscow: Nauka Publishers; 1977. p. 17–96.
- 580 51. Shi G, Grimaldi DA, Harlow GE, Wang J, Wang J, Yang M, et al. Age constraint on Burmese  
581 amber based on U-Pb dating of zircons. Cretac Res. 2012;37:155–63.
- 582 52. Bouckaert R, Heled J, Kühnert D, Vaughan T, Wu CH, Xie D, et al. BEAST 2: A Software  
583 Platform for Bayesian Evolutionary Analysis. PLoS Comput Biol. 2014;10:1–6.

- 584 53. Miller MA, Pfeiffer W, Schwartz T. Creating the CIPRES Science Gateway for inference of  
585 large phylogenetic trees. 2010 Gatew Comput Environ Work GCE 2010. 2010.
- 586 54. Adler D, Kelly ST. vioplot: violin plot. R package version 0.3.2. 2018.
- 587 55. Bouckaert RR, Drummond AJ. bModelTest: Bayesian phylogenetic site model averaging and  
588 model comparison. *BMC Evol Biol.* 2017;17:1–11.
- 589 56. Rambaut A, Drummond AJ, Xie D, Baele G, Suchard MA. Posterior Summarization in  
590 Bayesian Phylogenetics Using Tracer 1.7. *Syst Biol.* 2018;67 August:901–4.
- 591 57. Andújar C, Serrano J, Gómez-zurita J. Winding up the molecular clock in the genus *Carabus*  
592 ( Coleoptera : Carabidae ): assessment of methodological decisions on rate and node age  
593 estimates Supporting Online Material. :1–32.
- 594 58. Hofmann S, Stöck M, Zheng Y, Ficetola FG, Li JT, Scheidt U, et al. Molecular Phylogenies  
595 indicate a Paleo-Tibetan Origin of Himalayan Lazy Toads (*Scutigera*). *Sci Rep.* 2017;7:1–12.
- 596 59. Zachos J, Pagani M, Sloan L, Thomas E, Billups K. Trends, rhythms, and aberrations in  
597 global climate 65 Ma to present. *Science* (80- ). 2001;292:686–93.
- 598 60. Molnar P, England P, Martinod J. Mantle dynamics, uplift of the Tibetan Plateau, and the  
599 Indian Monsoon. 1993;:357–96.
- 600 61. Harrison T, Copeland P, Kidd W, Yin A. Raising Tibet. *Science* (80- ). 1992;:1663–70.
- 601 62. Li Y, Wang C, Dai J, Xu G, Hou Y, Li X. Propagation of the deformation and growth of the  
602 Tibetan-Himalayan orogen: A review. *Earth-Science Rev.* 2015;143:36–61.  
603 doi:10.1016/j.earscirev.2015.01.001.
- 604 63. Lippert PC, van Hinsbergen DJJ, Dupont-Nivet G. Early Cretaceous to present latitude of the  
605 central proto-Tibetan Plateau: A paleomagnetic synthesis with implications for Cenozoic  
606 tectonics, paleogeography, and climate of Asia. 2014;:1–21.
- 607
